# Supplementary material
Source: publisher site journal article supplement (https://www.dovepress.com/article/485389)
Supplement: Supplementary file 1 [file Supplementary%20material_3_1.doc]

Table S1 The names of the library used.

| Number | Name |
| --- | --- |
| 1 | ggplot2 |
| 2 | ggbreak |
| 3 | ggthemes |
| 4 | scales |
| 5 | tidyr |
| 6 | ggh4x |
| 7 | scales |

Table S2 The covariate investigation process of the population pharmacokinetic model of lidocaine and its active metabolites.

| Model | Model description | Compared against model | OFV | ΔOFV | *P* value |
| --- | --- | --- | --- | --- | --- |
| Forward inclusion | | | | | |
| 1 | Base model | / | 10208.285 | / | / |
| 2 | Add DURA on CL | Model 1 | 10207.112 | –1.173 | NS |
| 3 | Add HEI on CL | Model 1 | 10202.783 | –5.502 | < 0.05 |
| 4 | Add HGB on CL | Model 1 | 10203.011 | –5.274 | < 0.05 |
| 5 | Add IBW on CL | Model 1 | 10203.166 | –5.119 | < 0.05 |
| 6 | Add SIZE on CL | Model 1 | 10197.359 | –10.926 | < 0.05 |
| 7 | Add TBW on CL | Model 1 | 10204.784 | –3.501 | NS |
| 8 | Add TYPE on CL | Model 1 | 10207.269 | –1.016 | NS |
| 9 | Add ALT on CLD | Model 1 | 10207.778 | –0.507 | NS |
| 10 | Add CIRR on CLD | Model 1 | 10205.284 | –3.001 | NS |
| 11 | Add WBC on CLD | Model 1 | 10206.07 | –2.215 | NS |
| 12 | Add APTT on CLE | Model 1 | 10203.711 | –4.574 | < 0.05 |
| 13 | Add CIRR on CLE | Model 1 | 10202.378 | –5.907 | < 0.05 |
| 14 | Add DOSE on CLE | Model 1 | 10199.123 | –9.162 | < 0.05 |
| 15 | Add DURA on CLE | Model 1 | 10206.762 | –1.523 | NS |
| 16 | Add HGB on CLE | Model 1 | 10203.248 | –5.037 | < 0.05 |
| 17 | Add INR on CLE | Model 1 | 10203.031 | –5.254 | < 0.05 |
| 18 | Add PT on CLE | Model 1 | 10206.266 | –2.019 | NS |
| 19 | Add ALT on CLG | Model 1 | 10206.484 | –1.801 | NS |
| 20 | Add CIRR on CLG | Model 1 | 10204.598 | –3.687 | NS |
| 21 | Add DOSE on CLG | Model 1 | 10198.455 | –9.83 | < 0.05 |
| 22 | Add INR on CLG | Model 1 | 10203.479 | –4.806 | < 0.05 |
| 23 | Add PT on CLG | Model 1 | 10203.966 | –4.319 | < 0.05 |
| 24 | Add TYPE on CLG | Model 1 | 10205.833 | –2.452 | NS |
| 25 | Add APTT on FM | Model 1 | 10203.909 | –4.376 | < 0.05 |
| 26 | Add DOSE on FM | Model 1 | 10202.105 | –6.18 | < 0.05 |
| 27 | Add DURA on FM | Model 1 | 10202.105 | –6.18 | < 0.05 |
| 28 | Add HGB on FM | Model 1 | 10205.178 | –3.107 | NS |
| 29 | Add SIZE on FM | Model 1 | 10203.76 | –4.525 | < 0.05 |
| 30 | Add TBW on FM | Model 1 | 10201.182 | –7.103 | < 0.05 |
| 31 | Add AGE on V1 | Model 1 | 10205.655 | –2.63 | NS |
| 32 | Add ALT on V1 | Model 1 | 10207.774 | –0.511 | NS |
| 33 | Add CIRR on V1 | Model 1 | 10205.57 | –2.715 | NS |
| 34 | Add HGB on V1 | Model 1 | 10204.477 | –3.808 | NS |
| 35 | Add IBW on V1 | Model 1 | 10207.772 | –0.513 | NS |
| 36 | Add SIZE on V1 | Model 1 | 10206.143 | –2.142 | NS |
| 37 | Add TBW on V1 | Model 1 | 10205.845 | –2.44 | NS |
| 38 | Add TYPE on V1 | Model 1 | 10205.57 | –2.715 | NS |
| 39 | Add CIRR on V2 | Model 1 | 10203.984 | –4.301 | < 0.05 |
| 40 | Add DOSE on V2 | Model 1 | 10192.995 | –15.29 | < 0.05 |
| 41 | Add DURA on V2 | Model 1 | 10202.533 | –5.752 | < 0.05 |
| 42 | Add HEI on V2 | Model 1 | 10206.938 | –1.347 | NS |
| 43 | Add HGB on V2 | Model 1 | 10206.933 | –1.352 | NS |
| 44 | Add IBW on V2 | Model 1 | 10207.153 | –1.132 | NS |
| 45 | Add TBW on V2 | Model 1 | 10208.279 | –0.006 | NS |
| 46 | Base on Model 40, HEI on CL | Model 40 | 10187.24 | –5.755 | < 0.05 |
| 47 | Base on Model 40, HGB on CL | Model 40 | 10186.925 | –6.07 | < 0.05 |
| 48 | Base on Model 40, IBW on CL | Model 40 | 10187.642 | –5.353 | < 0.05 |
| 49 | Base on Model 40, SIZE on CL | Model 40 | 10183.207 | –9.788 | < 0.05 |
| 50 | Base on Model 40, APTT on CLE | Model 40 | 10188.412 | –4.583 | < 0.05 |
| 51 | Base on Model 40, CIRR on CLE | Model 40 | 10187.085 | –5.91 | < 0.05 |
| 52 | Base on Model 40, DOSE on CLE | Model 40 | 10184.417 | –8.578 | < 0.05 |
| 53 | Base on Model 40, HGB on CLE | Model 40 | 10188.107 | –4.888 | < 0.05 |
| 54 | Base on Model 40, INR on CLE | Model 40 | 101887.72 | –5.275 | < 0.05 |
| 55 | Base on Model 40, DOSE on CLG | Model 40 | 10183.615 | –9.38 | < 0.05 |
| 56 | Base on Model 40, INR on CLG | Model 40 | 10187.968 | –5.027 | < 0.05 |
| 57 | Base on Model 40, PT on CLE | Model 40 | 10188.536 | –4.459 | < 0.05 |
| 58 | Base on Model 40, APTT on FM | Model 40 | 10189.781 | –3.214 | NS |
| 59 | Base on Model 40, DOSE on FM | Model 40 | 10186.215 | –6.78 | < 0.05 |
| 60 | Base on Model 40, DURA on FM | Model 40 | 10188.433 | –4.562 | < 0.05 |
| 61 | Base on Model 40, SIZE on FM | Model 40 | 10188.36 | –4.635 | < 0.05 |
| 62 | Base on Model 40, TBW on FM | Model 40 | 10185.957 | –7.038 | < 0.05 |
| 63 | Base on Model 40, CIRR on V2 | Model 40 | 10191.43 | –1.565 | NS |
| 64 | Base on Model 40, DURA on V2 | Model 40 | 10192.412 | –0.583 | NS |
| 65 | Base on Model 49, HEI on CL | Model 49 | 10176.181 | –7.026 | < 0.05 |
| 66 | Base on Model 49, HGB on CL | Model 49 | 10178.291 | –4.916 | < 0.05 |
| 67 | Base on Model 49, IBW on CL | Model 49 | 10176.699 | –6.508 | < 0.05 |
| 68 | Base on Model 49, APTT on CLE | Model 49 | 10178.557 | –4.65 | < 0.05 |
| 69 | Base on Model 49, CIRR on CLE | Model 49 | 10177.332 | –5.875 | < 0.05 |
| 70 | Base on Model 49, DOSE on CLE | Model 49 | 10174.37 | –8.837 | < 0.05 |
| 71 | Base on Model 49, HGB on CLE | Model 49 | 10178.235 | –4.972 | < 0.05 |
| 72 | Base on Model 49, INR on CLE | Model 49 | 10177.988 | –5.219 | < 0.05 |
| 73 | Base on Model 49, DOSE on CLG | Model 49 | 10172.83 | –10.377 | < 0.05 |
| 74 | Base on Model 49, INR on CLG | Model 49 | 10178.204 | –5.003 | < 0.05 |
| 75 | Base on Model 49, PT on CLG | Model 49 | 10178.753 | –4.454 | < 0.05 |
| 76 | Base on Model 49, DOSE on FM | Model 49 | 10176.58 | –6.627 | < 0.05 |
| 77 | Base on Model 49, DURA on FM | Model 49 | 10178.676 | –4.531 | < 0.05 |
| 78 | Base on Model 49, SIZE on FM | Model 49 | 10178.647 | –4.56 | < 0.05 |
| 79 | Base on Model 49, TBW on FM | Model 49 | 10176.125 | –7.082 | < 0.05 |
| 80 | Base on Model 73, HEI on CL | Model 73 | 10165.812 | –7.018 | < 0.05 |
| 81 | Base on Model 73, HGB on CL | Model 73 | 10167.773 | –5.507 | < 0.05 |
| 82 | Base on Model 73, IBW on CL | Model 73 | 10166.331 | –6.499 | < 0.05 |
| 83 | Base on Model 73, APTT on CLE | Model 73 | 10168.205 | –4.625 | < 0.05 |
| 84 | Base on Model 73, CIRR on CLE | Model 73 | 10167.266 | –5.564 | < 0.05 |
| 85 | Base on Model 73, DOSE on CLE | Model 73 | 10167.911 | –4.919 | < 0.05 |
| 86 | Base on Model 73, HGB on CLE | Model 73 | 10168.328 | –4.502 | < 0.05 |
| 87 | Base on Model 73, INR on CLE | Model 73 | 10168.144 | –4.686 | < 0.05 |
| 88 | Base on Model 73, INR on CLG | Model 73 | 10171.397 | –1.433 | NS |
| 89 | Base on Model 73, PT on CLG | Model 73 | 10171.487 | –1.343 | NS |
| 90 | Base on Model 73, DOSE on FM | Model 73 | 10164.487 | –8.343 | < 0.05 |
| 91 | Base on Model 73, DURA on FM | Model 73 | 10167.749 | –5.081 | < 0.05 |
| 92 | Base on Model 73, SIZE on FM | Model 73 | 10167.929 | –4.901 | < 0.05 |
| 93 | Base on Model 73, TBW on FM | Model 73 | 10166.43 | –6.4 | < 0.05 |
| 94 | Base on Model 90, HEI on CL | Model 90 | 10157.484 | –7.003 | < 0.05 |
| 95 | Base on Model 90, HGB on CL | Model 90 | 10159.274 | –5.213 | < 0.05 |
| 96 | Base on Model 90, IBW on CL | Model 90 | 10158.003 | –6.484 | < 0.05 |
| 97 | Base on Model 90, APTT on CLE | Model 90 | 10158.682 | –5.805 | < 0.05 |
| 98 | Base on Model 90, CIRR on CLE | Model 90 | 10160.345 | –4.142 | < 0.05 |
| 99 | Base on Model 90, DOSE on CLE | Model 90 | 10162.808 | –1.679 | NS |
| 100 | Base on Model 90, HGB on CLE | Model 90 | 10161.545 | –2.942 | NS |
| 101 | Base on Model 90, INR on CLE | Model 90 | 10161.406 | –3.08 | NS |
| 102 | Base on Model 90, DURA on FM | Model 90 | 10163.529 | –0.958 | NS |
| 103 | Base on Model 90, SIZE on FM | Model 90 | 10163.614 | –0.873 | NS |
| 104 | Base on Model 90, TBW on FM | Model 90 | 10155.926 | –8.561 | < 0.05 |
| 105 | Base on Model 104, HEI on CL | Model 104 | 10148.966 | –6.96 | < 0.05 |
| 106 | Base on Model 104, HGB on CL | Model 104 | 10150.74 | –5.186 | < 0.05 |
| 107 | Base on Model 104, IBW on CL | Model 104 | 10149.48 | –6.446 | < 0.05 |
| 108 | Base on Model 104, APTT on CLE | Model 104 | 10151.388 | –4.538 | < 0.05 |
| 109 | Base on Model 104, CIRR on CLE | Model 104 | 10152.155 | –3.771 | NS |
| 110 | Base on Model 107, HGB on CL | Model 107 | 10147.214 | –2.266 | NS |
| 111 | Base on Model 107, APTT on CLE | Model 107 | 10144.856 | –4.624 | < 0.05 |
| Backward elimination | | | | | |
| 112 | Base on Model 111, delete IBW on CL | Model 111 | 10151.388 | 6.532 | NS |
| 113 | Base on Model 111, delete SIZE on CL | Model 111 | 10155.574 | 10.718 | NS |
| 114 | Base on Model 111, delete APTT on CLE | Model 111 | 10149.48 | 4.624 | NS |
| 115 | Base on Model 111, delete DOSE on CLG | Model 111 | 10156.432 | 11.576 | < 0.001 |
| 116 | Base on Model 111, delete DOSE on FM | Model 111 | 10156.102 | 11.246 | < 0.001 |
| 117 | Base on Model 111, delete TBW on FM | Model 111 | 10152.098 | 7.242 | NS |
| 118 | Base on Model 111, delete DOSE on V2 | Model 111 | 10160.248 | 15.392 | < 0.001 |

Notes: NS, no statistical significance. Assuming that the apparent distribution volume (V1) of MEGX and GX were equal to central compartment (lidocaine). CL, lidocaine clearance; V2, apparent distribution volume of the peripheral compartment; CLD, inter-compartmental clearance. The formation of active metabolites was modeled through two metabolic compartments (MEGX and GX). CLFM, the proportion of clearance for fraction metabolism of lidocaine to MEGX; CLE, elimination clearance of MEGX; CLEFM, the proportion of clearance for fraction metabolism of MEGX to GX; CLG, elimination clearance of GX. HEI, Height; TBW, Total body weight; IBW, Ideal body weight; HGB, Hemoglobin; PLT, Platelet; ALT, Alanine aminotransferase; DURA, The duration of Pringle maneuvers; SIZE, Tumor size; DOSE, Total doses of lidocaine; TYPE, extent of liver resection (segment or lobe resection); CIRR, presence or absence of liver cirrhosis.

Table S3 The results of variability based on key covariates.

| Model | Model description | Inter-Individual Variability (%CV) | | | | | | | |
| --- | --- | --- | --- | --- | --- | --- | --- | --- | --- |
| CL | V1 | CLFM | V2 | CLD | CLEF*M | CLE | CLG |
| 1 | Basic Model | 13.1 | 1.86 | 11.63 | 31.1 | 57.4 | NA | 2.97 | 21.2 |
| 2 | Add SIZE on CL | 9.55 | 1.84 | 11.6 | 30.7 | 57.6 | NA | 3 | 21.1 |
| 3 | Add ALT on CL | 13.3 | 0.33 | 11 | 31.3 | 60.3 | NA | 5.19 | 35.4 |
| 4 | Add TYPE on CL | 12.6 | 1.87 | 11.6 | 30.9 | 56.4 | NA | 2.97 | 21.2 |
| 5 | Add SIZE on V1 | 13 | 1.85 | 11 | 31 | 56 | NA | 3.51 | 20.5 |
| 6 | Add ALT on V1 | 13.1 | 1.76 | 11.7 | 31 | 57.9 | NA | 2.86 | 21.5 |
| 7 | Add TYPE on V1 | 13 | 1.69 | 12 | 30.3 | 55.1 | NA | 2.38 | 22.2 |
| 8 | Add SIZE on CLFM | 13.1 | 1.74 | 10.1 | 30.9 | 57.1 | NA | 3.02 | 21.6 |
| 9 | Add ALT on CLFM | 13.3 | 0.18 | 11 | 31.2 | 60.3 | NA | 5.3 | 35.8 |
| 10 | Add TYPE on CLFM | 13.3 | 0.2 | 10.3 | 31.4 | 60.3 | NA | 5.26 | 35.7 |
| 11 | Add SIZE on V2 | 13.3 | 0.32 | 11 | 31.3 | 60.4 | NA | 5.19 | 35.4 |
| 12 | Add ALT on V2 | 13.3 | 0.31 | 11 | 31.2 | 60.4 | NA | 5.18 | 35.4 |
| 13 | Add TYPE on V2 | 13.2 | 0.37 | 11 | 30.7 | 59.7 | NA | 5.17 | 35.3 |
| 14 | Add SIZE on CLD | 13.6 | 0.28 | 10.9 | 30.7 | 53.6 | NA | 5.3 | 35.3 |
| 15 | Add ALT on CLD | 13.1 | 1.8 | 11.6 | 31.2 | 57.8 | NA | 2.98 | 21.1 |
| 16 | Add TYPE on CLD | 13.4 | 0.3 | 11 | 31.2 | 60.5 | NA | 5.19 | 35.4 |
| 17 | Add SIZE on CLE | 13.4 | 0.65 | 10.5 | 31.3 | 60.4 | NA | 4.95 | 34.8 |
| 18 | Add ALT on CLE | 13.1 | 2.06 | 11.1 | 31.4 | 58.5 | NA | 2.31 | 22 |
| 19 | Add TYPE on CLE | 13.3 | 0.32 | 11 | 31.3 | 60.3 | NA | 5.19 | 35.4 |
| 20 | Add SIZE on CLG | 13.3 | 0.22 | 11.1 | 31.2 | 59.9 | NA | 5.23 | 31.9 |
| 21 | Add ALT on CLG | 13.1 | 1.81 | 11.7 | 31 | 57 | NA | 3.02 | 20.1 |
| 22 | Add TYPE on CLG | 13.1 | 1.73 | 11.8 | 31.1 | 57.4 | NA | 3.05 | 19.6 |

Notes: * Fixed to 0. Assuming that the apparent distribution volume (V1) of MEGX and GX were equal to central compartment (lidocaine). CL, lidocaine clearance; CLFM, the proportion of clearance for fraction metabolism of lidocaine to MEGX; V2, apparent distribution volume of the peripheral compartment; CLD, inter-compartmental clearance; CLEFM, the proportion of clearance for fraction metabolism of MEGX to GX; CLE, elimination clearance of MEGX; CLG, elimination clearance of GX. SIZE，tumor size; ALT, alanine aminotransferase; TYPE, xtent of liver resection (segment or lobe resection).

Table S4 The results of sensitivity analyses under different assumptions.

| Model | Model description | Compared against model | Parameters | Changes in estimated values | OFV | ΔOFV | |
| --- | --- | --- | --- | --- | --- | --- | --- |
| 1 | Basic Model | / | CL ( (L/h) | 26.1 | 10160.31 | / |  |
| 2 | Change CL | 1 | CL ( (L/h) | 15 | 10160.31 | 0 |  |
| 3 | Change CL | 1 | CL ( (L/h) | 20 | 10160.31 | 0 |  |
| 4 | Change CL | 1 | CL ( (L/h) | 25 | 10160.31 | 0 |  |
| 5 | Change CL | 1 | CL ( (L/h) | 30 | 10160.31 | 0 |  |
| 1 | Basic Model | / | V1 (L) | 8.73 | 10160.31 | / |  |
| 6 | Change V1 | 1 | V1 (L) | 10 | 10160.31 | 0 |  |
| 7 | Change V1 | 1 | V1 (L) | 15 | 10160.31 | 0 |  |
| 8 | Change V1 | 1 | V1 (L) | 20 | 10160.31 | 0 |  |
| 1 | Basic Model | / | CLFM | 0.0182 | 10160.31 | / |  |
| 9 | Change CLFM | 1 | CLFM | 0.015 | 10160.31 | 0 |  |
| 10 | Change CLFM | 1 | CLFM | 0.01 | 10160.31 | 0 |  |
| 11 | Change CLFM | 1 | CLFM | 0.025 | 10160.31 | 0 |  |
| 1 | Basic Model | / | V2 (L) | 63.6 | 10160.31 | / |  |
| 12 | Change V2 | 1 | V2 (L) | 55 | 10160.31 | 0 |  |
| 13 | Change V2 | 1 | V2 (L) | 70 | 10160.31 | 0 |  |
| 14 | Change V2 | 1 | V2 (L) | 75 | 10160.31 | 0 |  |
| 1 | Basic Model | / | CLD (L/h) | 41 | 10160.31 | / |  |
| 15 | Change CLD | 1 | CLD (L/h) | 35 | 10160.31 | 0 |  |
| 16 | Change CLD | 1 | CLD (L/h) | 45 | 10160.31 | 0 |  |
| 17 | Change CLD | 1 | CLD (L/h) | 50 | 10160.31 | 0 |  |
| 1 | Basic Model | / | CLEFM | 0.897 | 10160.31 | / |  |
| 18 | Change CLEFM | 1 | CLEFM | 0.5 | 10160.31 | 0 |  |
| 19 | Change CLEFM | 1 | CLEFM | 1 | 10160.31 | 0 |  |
| 20 | Change CLEFM | 1 | CLEFM | 1.5 | 10160.31 | 0 |  |
| 1 | Basic Model | / | CLE (L/h) | 1.41 | 10160.31 | / |  |
| 21 | Change CLE | 1 | CLE (L/h) | 1 | 10160.31 | 0 |  |
| 22 | Change CLE | 1 | CLE (L/h) | 2 | 10160.31 | 0 |  |
| 23 | Change CLE | 1 | CLE (L/h) | 2.5 | 10160.31 | 0 |  |
| 1 | Basic Model | / | CLG (L/h) | 4.77 | 10160.31 | / |  |
| 24 | Change CLG | 1 | CLG (L/h) | 2.5 | 10160.31 | 0 |  |
| 25 | Change CLG | 1 | CLG (L/h) | 5.5 | 10160.31 | 0 |  |
| 26 | Change CLG | 1 | CLG (L/h) | 7 | 10160.31 | 0 |  |

Notes: Assuming that the apparent distribution volume (V1) of MEGX and GX were equal to central compartment (lidocaine). CL, lidocaine clearance; CLFM, the proportion of clearance for fraction metabolism of lidocaine to MEGX; V2, apparent distribution volume of the peripheral compartment; CLD, inter-compartmental clearance; CLEFM, the proportion of clearance for fraction metabolism of MEGX to GX; CLE, elimination clearance of MEGX; CLG, elimination clearance of GX.

Figure S1 Distribution diagram of continuous covariates.

Notes: The scatter plot in the lower left part shows the correlation between the covariates, while the upper right part displays the correlation coefficients between the covariates. CL, lidocaine clearance. HEI, Height; TBW, Total body weight; IBW, Ideal body weight; HGB, Hemoglobin; PLT, Platelet; ALT, Alanine aminotransferase; DURA, The duration of Pringle maneuvers; SIZE, Tumor size; DOSE, Total doses of lidocaine; TYPE, extent of liver resection (segment or lobe resection); CIRR, presence or absence of liver cirrhosis.


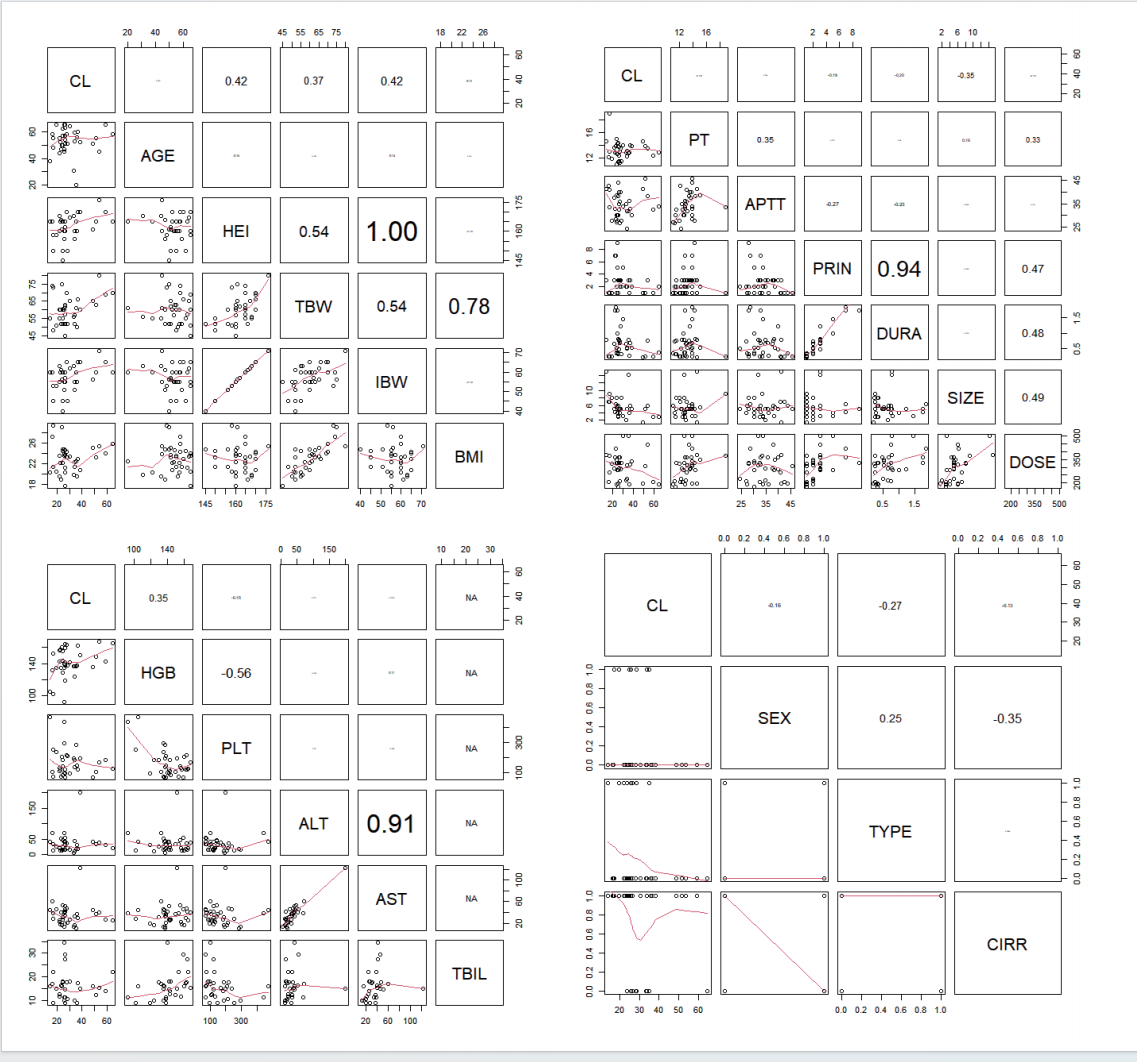


Figure S2 External validation of final model of lidocaine.

Notes: The observed values (black scatter points) were depicted with 50th percentile (red lines) and the 50th percentile predictions (black dashed lines) were depicted with the 95% confidence interval (blue shaded area). Blue, purple and green scatter points (Lidocaine) are respectively from the research of Crouch *et al.*,[4]Tognolini *et al.*,[5] *and* Koppert *et al.*.[6]

[4] Crouch C E, Wilkey B J, Hendrickse A*, et al*. Lidocaine Intraoperative Infusion Pharmacokinetics during Partial Hepatectomy for Living Liver Donation[J]. Anesthesiology, 2022,138(1):71-81.

[5] Tognolini A R, Liu X, Pandey S*, et al*. Dosing optimisation of intravenous lidocaine in patients with class 1–3 obesity by population pharmacokinetic analysis[J]. Anaesthesia, 2025,80(5):511-521.

[6] Koppert W, Weigand M, Neumann F*, et al*. Perioperative Intravenous Lidocaine Has Preventive Effects on Postoperative Pain and Morphine Consumption After Major Abdominal Surgery[J]. Anesthesia & Analgesia, 2004,98(4):1050-1055.

*
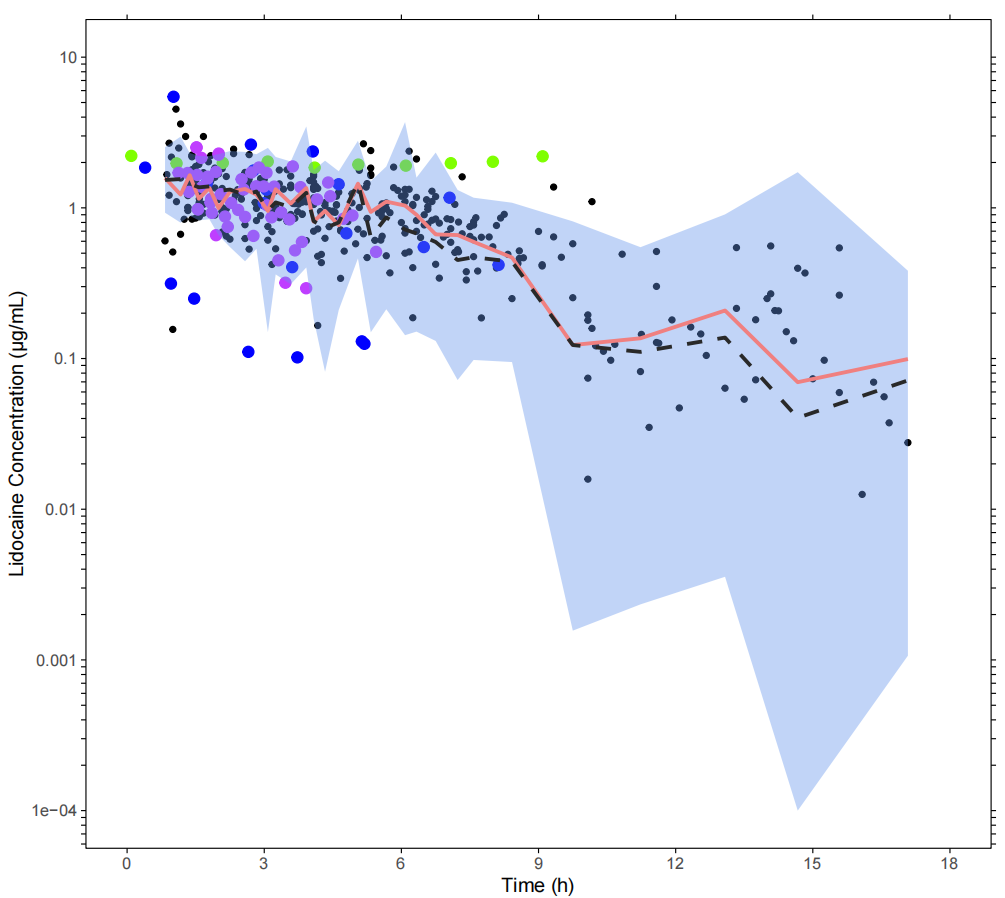
*
